# Supplementary material for: Restriction spectrum imaging with elastic image registration for automated evaluation of response to neoadjuvant therapy in breast cancer
Source: PubMed Central journal article supplement (PMC10541212; doi:10.3389/fonc.2023.1237720), 2023-09-15
Supplement: Table_1.pdf [file Table_1.pdf]

### Supplemental Table 1

Sensitivity and accuracy given specificity  $\geq 90\%$  and receiver operating characteristics (ROC) area under the curve (AUC) for prediction of non-pCR for manual dynamic contrast-enhanced MRI (DCE), three-component Restriction Spectrum Imaging model (RSI<sub>3C</sub>) classifier and the mean apparent diffusion coefficient (ADC) after all neoadjuvant therapy prior to surgical intervention (post-Tx time point).

|                                     | DCE              | RSI <sub>3C</sub> | ADC                                        |
|-------------------------------------|------------------|-------------------|--------------------------------------------|
| Threshold value                     | 1.3 cm           | 0.75 cm           | $0.5 \times 10^{-3} \text{ mm}^2/\text{s}$ |
| Specificity threshold               | 0.90             | 0.90              | 1.00                                       |
| Sens <sub>90</sub> (95% CI) Post-Tx | 0.65 (0.38-0.86) | 0.71 (0.44-0.90)  | 0.00 (0.00-0.20)*                          |
| Acc <sub>90</sub> (95% CI) Post-Tx  | 0.74 (0.54-0.89) | 0.78 (0.58-0.91)  | 0.37 (0.19-0.58)*                          |
| ROC AUC                             | 0.79             | 0.80              | 0.52                                       |

\*Specificity  $\geq 90\%$  is achieved by a threshold where all cases are classified as pCR (specificity = 100%). For reference, sensitivity was 0.18 and accuracy 0.41 when using a specificity  $\geq 80\%$ .

pCR = pathological complete response, Sens<sub>90</sub> = sensitivity given specificity  $\geq 90\%$ , Acc<sub>90</sub> = accuracy given specificity  $\geq 90\%$ , Tx = treatment.
