# Supplementary material for: Restriction spectrum imaging with elastic image registration for automated evaluation of response to neoadjuvant therapy in breast cancer
Source: PubMed Central journal article supplement (PMC10541212; doi:10.3389/fonc.2023.1237720), 2023-09-15
Supplement: Table_2.pdf [file Table_2.pdf]

## Supplemental Table 2

Sensitivity and accuracy given specificity  $\geq 90\%$  and receiver operating characteristics (ROC) area under the curve (AUC) for performance of  $\Delta DCE$ ,  $\Delta RSI_{3C}$  and  $\Delta ADC$  for prediction of non-pCR at each time point. Since there was no threshold value yielding specificity = 90% for any modality at any time point, the closest threshold of specificity = 100% was used. Note that post-Tx time point is after all neoadjuvant therapy prior to surgical intervention. Threshold values are unitless multiplication factors.

|                       |                    | $\Delta DCE$     | $\Delta RSI_{3C}$ | $\Delta ADC$ ( $\uparrow$ = response) |
|-----------------------|--------------------|------------------|-------------------|---------------------------------------|
| Early-Tx<br>(3 weeks) | AUC (95%CI)        | 0.64 (0.36-0.91) | 0.65 (0.38-0.92)  | 0.45 (0.16-0.75)                      |
|                       | Sens <sub>90</sub> | 0.55             | 0.18              | 0.09                                  |
|                       | Acc <sub>90</sub>  | 0.71             | 0.47              | 0.41                                  |
|                       | Thresh.            | -0.07            | 0.12              | -0.17                                 |
| Mid-Tx<br>(12 weeks)  | AUC (95%CI)        | 0.71 (0.45-0.96) | 0.60 (0.32-0.88)  | 0.35 (0.06-0.64)                      |
|                       | Sens <sub>90</sub> | 0.46             | 0.36              | 0.00*                                 |
|                       | Acc <sub>90</sub>  | 0.65             | 0.59              | 0.35*                                 |
|                       | Thresh.            | -0.23            | -0.15             | -0.77                                 |
| Post-Tx               | AUC (95%CI)        | 0.80 (0.59-1.00) | 0.76 (0.52-0.99)  | 0.36 (0.07-0.65)                      |
|                       | Sens <sub>90</sub> | 0.55             | 0.64              | 0.00*                                 |
|                       | Acc <sub>90</sub>  | 0.71             | 0.76              | 0.35*                                 |
|                       | Thresh.            | -0.48            | -0.81             | -0.73                                 |

\*Specificity  $\geq 90\%$  is achieved by a threshold where all cases are classified as pCR (specificity = 100%). For reference, sensitivity was 0.09 and accuracy 0.35 when using a specificity  $\geq 80\%$ .

*pCR = pathological complete response, Sens<sub>90</sub> = sensitivity given specificity  $\geq 90\%$ , Acc<sub>90</sub> = accuracy given specificity  $\geq 90\%$ , Tx = treatment,  $\Delta DCE$  = change in size from pre-treatment time point for manual dynamic contrast-enhanced MRI,  $\Delta RSI_{3C}$  = change in size from pre-treatment time point for the three-component Restriction Spectrum Imaging model classifier,  $\Delta ADC$  = change in mean value from pre-treatment time point for apparent diffusion coefficient.*
